# Supplementary material
Source: PubMed Central journal article supplement (PMC3062351)
Supplement: blood-2010-07-295238_1.pdf [file blood-2010-07-295238_1.pdf]

**Table S1. Patient information**

| Patient      | Diagnosis               | Mutations/cytogenetics                                                                                         | p53 staining  |
|--------------|-------------------------|----------------------------------------------------------------------------------------------------------------|---------------|
| 1            | Diamond Blackfan anemia | No RPS19 mutation                                                                                              | Weak          |
| 2            | Diamond Blackfan anemia | No testing done                                                                                                | Weak          |
| 3 (Panel C)  | Diamond Blackfan anemia | No testing done                                                                                                | Strong        |
| 4            | Diamond Blackfan anemia | RPS19 splice site mutation                                                                                     | Weak          |
| 5            | Diamond Blackfan anemia | No mutation in RPS19, RPS24, RPL5, RPL9, RPL11, RPL14, RPL35a, RPL36, RPS7, RPS10, RPS15, RPS17, RPS26, RPS27A | Weak          |
| 6 (Panel D)  | Diamond Blackfan anemia | No RPS19 mutation                                                                                              | Strong        |
| 7            | Diamond Blackfan anemia | No testing done                                                                                                | Weak          |
| 8            | Diamond Blackfan anemia | No testing done                                                                                                | Weak          |
| 9 (Panel E)  | MDS with del(5q)        | 46,XY,del(5)(q22q34)[2]/46,XY[18]                                                                              | Strong, focal |
| 10 (Panel F) | MDS with del(5q)        | 46,XX,del(5q)(q13q33)[5]/45,sl,dic(17:20)(p11.2;q11.2)[9]/45,sdl1,t(4:15)(q25;q21)[3]/46,XX,[3]                | Strong        |
| 11           | MDS with del(5q)        | 46,XY,del(5)(q15q31)[17]/46,XY[3]                                                                              | Negative      |
| 12           | MDS with del(5q)        | 46,XY,del(5)(q12q35)[6]/46,XY[cp6]                                                                             | Negative      |

**Table S2. shRNA sequences**

| Gene Name    | Gene symbol | RefSeqID  |          | shRNA sequence              |
|--------------|-------------|-----------|----------|-----------------------------|
| <i>RPS14</i> | RPS14       | NM_005617 | shRNA #1 | 5'-CCGAGATGAATCCTCACCATA-3' |
|              |             |           | shRNA #2 | 5'-GCTATGTTGGCTGCCCAGGAT-3' |
| <i>RPS19</i> | RPS19       | NM_001022 | shRNA #1 | 5'-CTACGATGAGAACTGGTTCTA-3' |
|              |             |           | shRNA #2 | 5'-GCTTGCTCCCTACGATGAGAA-3' |

**Table S3. Primer sequences**

| Gene Name    | Gene symbol | RefSeqID  | Primer sequences |                          |
|--------------|-------------|-----------|------------------|--------------------------|
| <i>RPS14</i> | RPS14       | NM_005617 | Forward          | 5'CTCAGGTGGCTGAAGGAGAG3' |
|              |             |           | Reverse          | 5'GCAGCCAACATAGCAGCATA3' |
| <i>RPS19</i> | RPS19       | NM_001022 | Forward          | 5'AGACGTGAACCAGCAGGAGT3' |
|              |             |           | Reverse          | 5'TTCTCTGACGTCCCCCATAG3' |
| <i>p53</i>   | TP53        | NM_000546 | Forward          | 5'GTTCCGAGAGCTGAATGAGG3' |
|              |             |           | Reverse          | 5'TCTGAGTCAGGCCCTTCTGT3' |

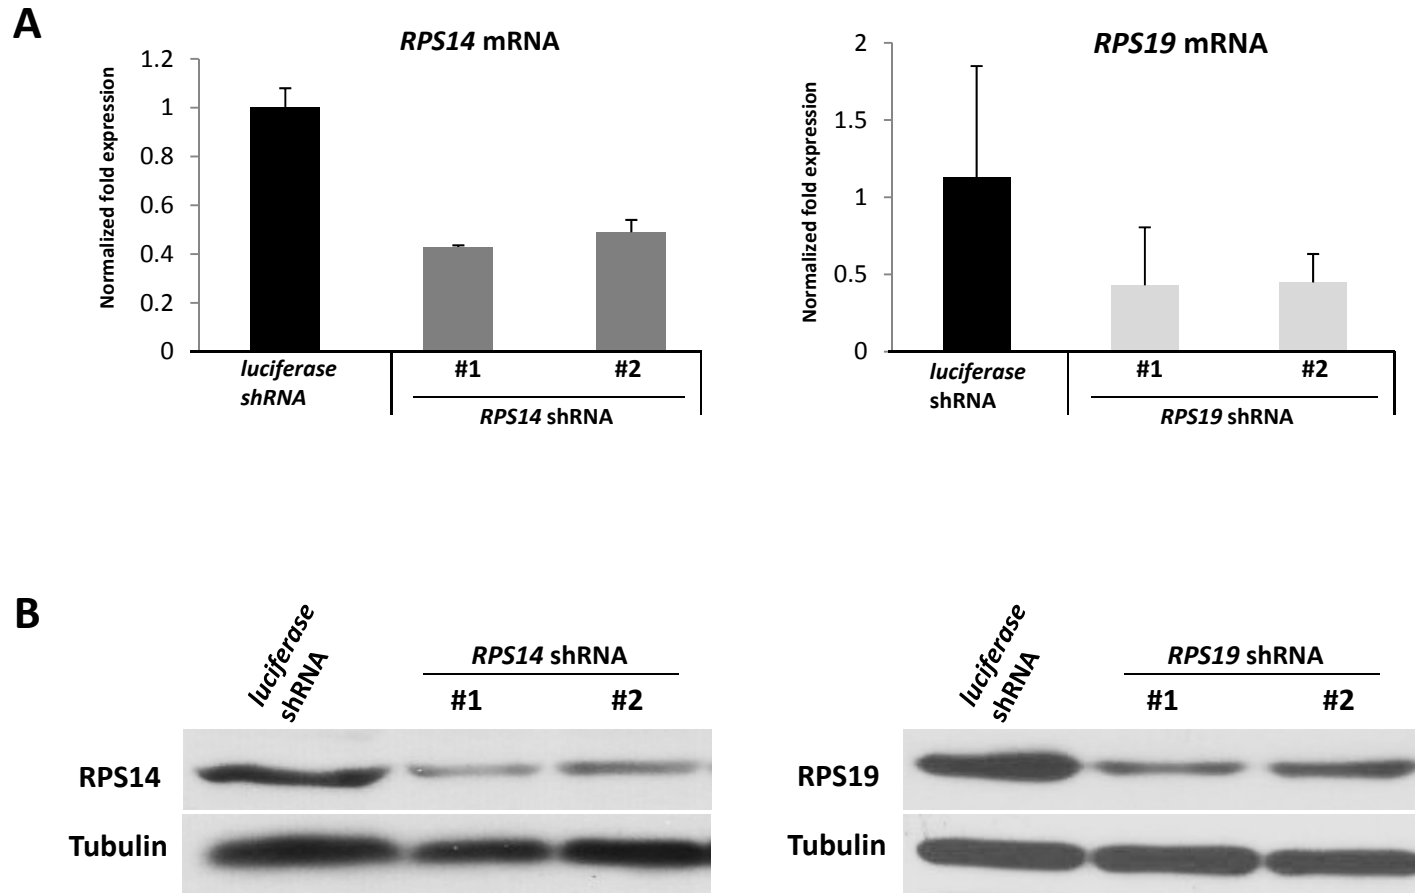

**Figure S1. Efficacy of RPS14 and RPS19 shRNAs.** Quantitative RT-PCR and western blots for the expression of RPS14 and RPS19 gene and protein after their knockdown using indicated shRNAs. RT-PCR was performed in primary human CD34+ bone marrow cells (CD34+) and the westerns were performed in HEL (human erythroleukemia) cells. \* denotes  $p < .05$ , and \*\* denotes  $p < .01$ .

**A**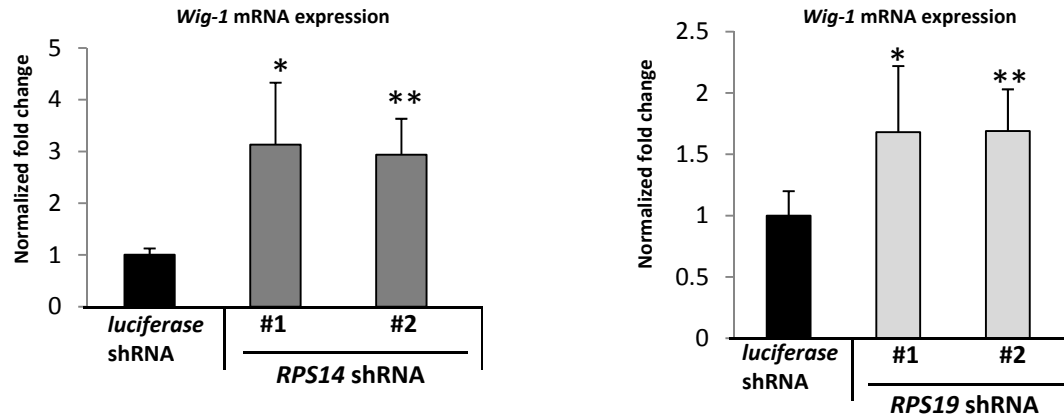**B**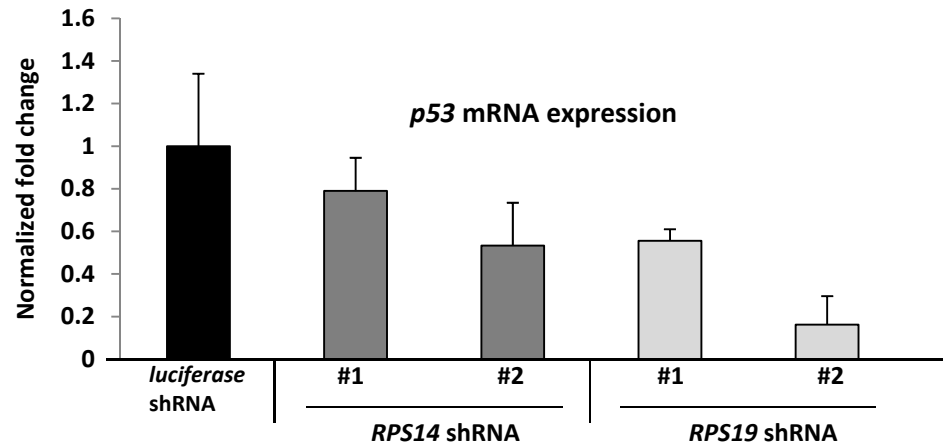

**Figure S2. Efficacy of *RPS14* and *RPS19* shRNAs.** Quantitative RT-PCR for the expression of the indicated genes was performed in primary human CD34+ bone marrow cells (CD34+). \* denotes  $p < .05$ , and \*\* denotes  $p < .01$ .

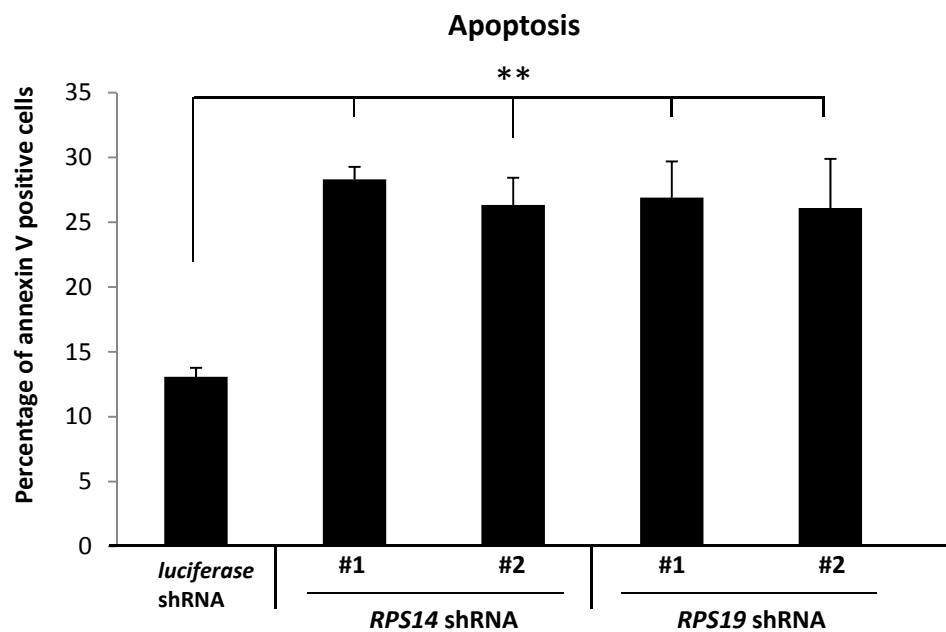

**Figure S3. *RPS14* and *RPS19* shRNAs increase apoptosis of primary human bone marrow CD34<sup>+</sup> cells.** Apoptotic cells were analyzed by flow cytometry after annexin V staining. \* denotes  $p < .05$ , and \*\* denotes  $p < .01$ . Results shown for each experiment are representative of three independent experiments performed in triplicate (mean  $\pm$  SEM);

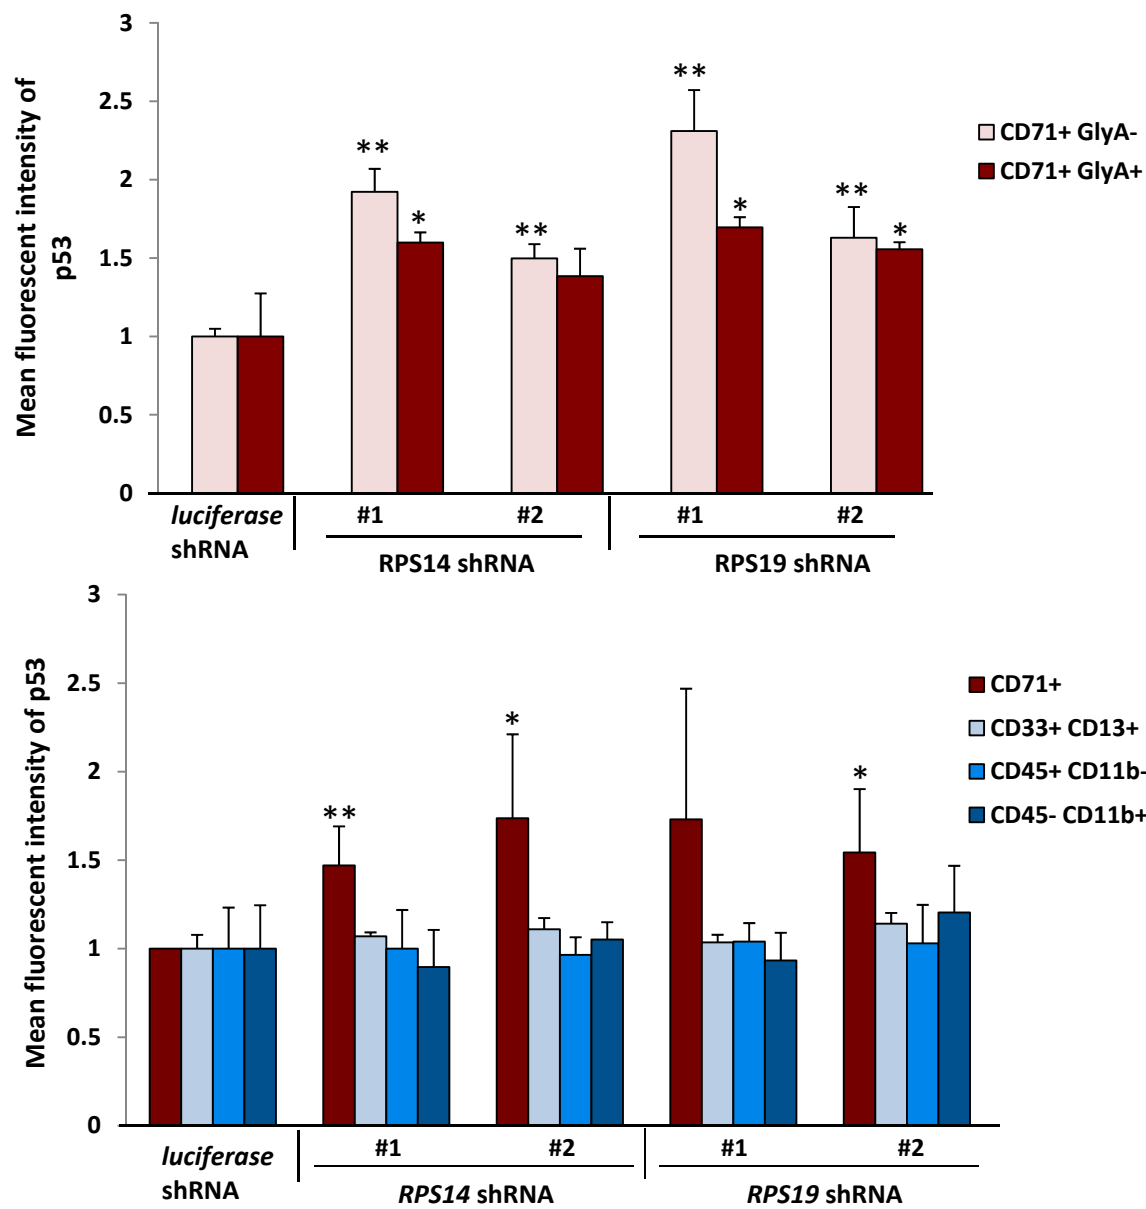

**Figure S4. Activation of p53 in erythroid cells.** (A) Protein levels for p53 were analyzed by intracellular flow cytometry in cells expressing control (*luciferase*), *RPS14*, or *RPS19* shRNAs. Erythroid cell stage was determined by staining for the erythroid markers CD71 and GlyA. Expression of CD71 precedes expression of GlyA. (B) Protein levels for p53 by intracellular flow cytometry in cells expressing control (*luciferase*), *RPS14*, or *RPS19* shRNAs. Early myeloid cell stages were determined by staining for the myeloid markers CD33, CD13 and CD45. \* denotes  $p < .05$ , and \*\* denotes  $p < .01$ .

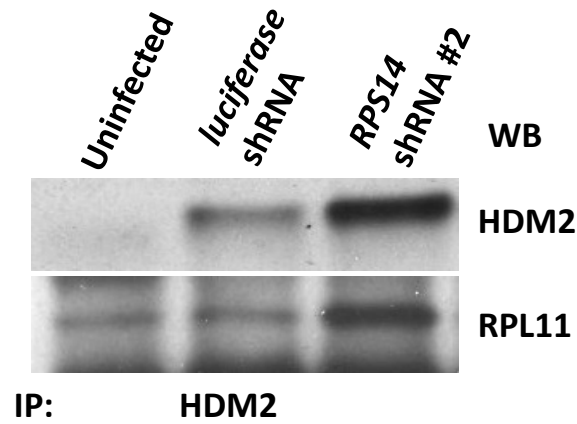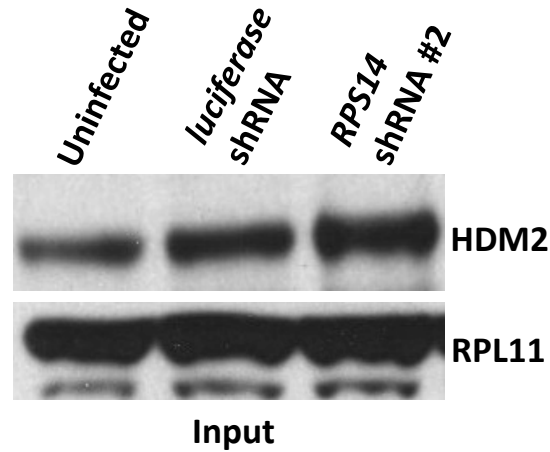

**Figure S5. Partial knockdown of *RPS14* using shRNA#2 leads to binding of RPL11 to HDM2**, consistent with the results of RPS14 shRNA #1 shown in Figure 3. Immunoprecipitation from A549 cell lysates were performed using anti-HDM2 or normal rabbit IgG antibodies. Western blots show the levels of HDM2 and RPL11 in the immunoprecipitates.



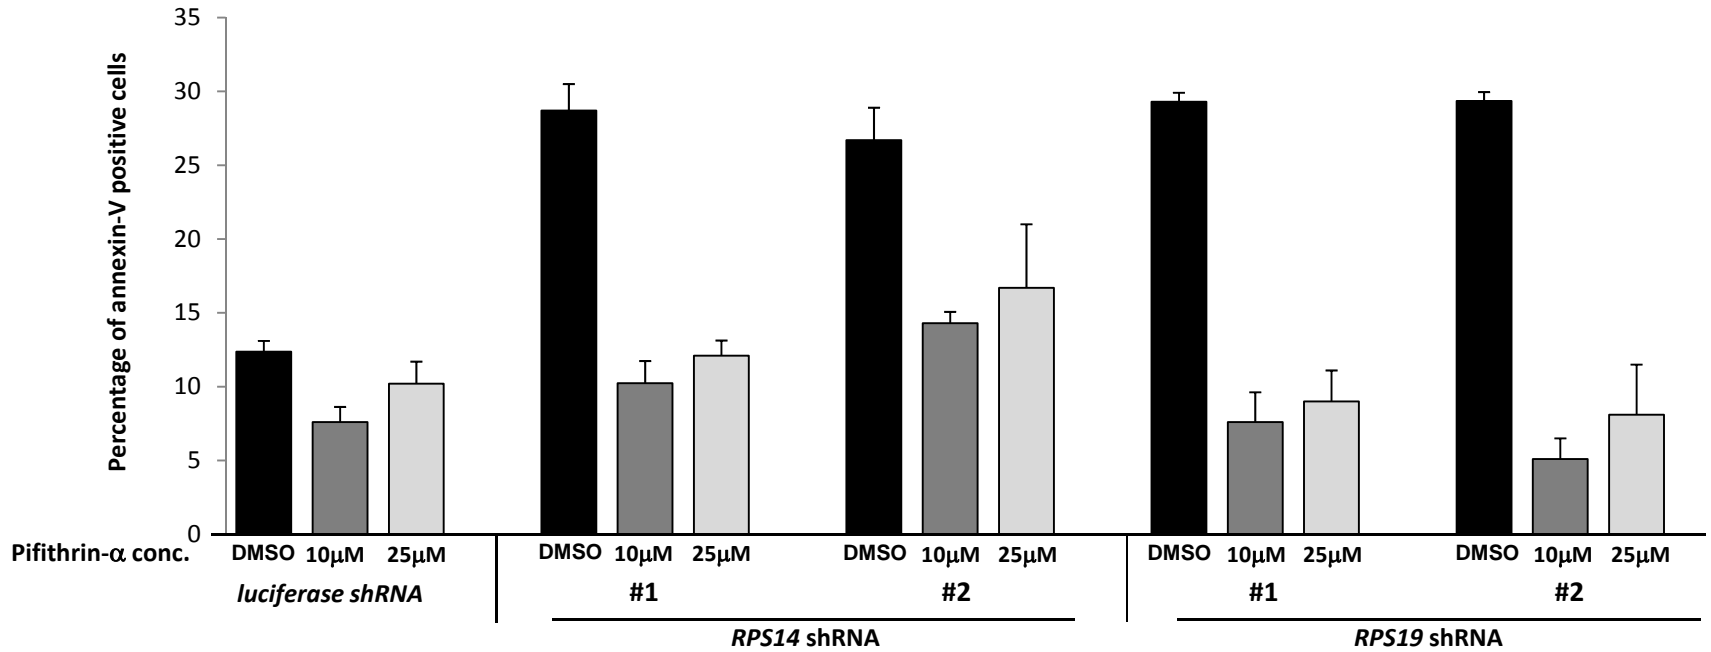

**Figure S6. Pifithrin- $\alpha$  treatment of CD34+ cells rescues the apoptotic phenotype.** After infection of CD34+ cells with either control shRNA against *luciferase* gene or against *RPS14* and *RPS19*, cells were treated with different concentrations of PFT-a (a p53 inhibitor). After 96 hours, apoptotic cells were assessed by flow cytometry using annexin V antibody. Results shown for each experiment are representative of three independent experiments performed in triplicate (mean  $\pm$  SEM);
